# Supplementary material for: Clinical Performance of the RealTime High Risk HPV Assay on Self-Collected Vaginal Samples within the VALHUDES Framework
Source: PubMed Central journal article supplement (PMC9602690; doi:10.1128/spectrum.01631-22), 2022-09-01
Supplement: spectrum.01631-22-s0001.pdf [file spectrum.01631-22-s0001.pdf]

## Supplementary Material

### The clinical performance of the RealTime High Risk HPV assay on self-collected vaginal samples within the VALHUDES framework

#### *Excluded samples*

- No urine samples were collected (n=4)
- No cervical samples were collected (n=2)
- No vaginal sample were collected (n=1)
- No Multi-Collect were collected (n=1)
- No colposcopy performed (n=1)
- Inadequate biopsy (1)
- Major protocol violations on urine samples (n=14)
- Invalid HPV test result on vaginal samples (n=8)
- Invalid HPV test result on cervical samples (n=5)

Supplementary Table S1. HPV prevalence and disease outcome by age group and total study population.

| Age category | Participants<br>N (%) | Cervical<br>hrHPV | Vaginal (E+Q)<br>hrHPV<br>CN $\leq$ 32 <sup>a</sup> | Vaginal (E+Q)<br>hrHPV<br>CN $\leq$ 35 <sup>b</sup> | Disease outcome |                |                |
|--------------|-----------------------|-------------------|-----------------------------------------------------|-----------------------------------------------------|-----------------|----------------|----------------|
|              |                       | Pos<br>N (%)      | Pos<br>N (%)                                        | Pos<br>N (%)                                        | <CIN2<br>N (%)  | CIN2+<br>N (%) | CIN3+<br>N (%) |
| <30          | 96 (19.8)             | 65 (22.7)         | 64 (23.5)                                           | 71 (23.8)                                           | 73 (18.2)       | 23 (27.4)      | 10 (23.3)      |
| 30-34        | 84 (17.3)             | 56 (19.6)         | 51 (18.8)                                           | 53 (17.8)                                           | 65 (16.2)       | 19 (22.6)      | 10 (23.3)      |
| 35-39        | 53 (10.9)             | 23 (8.0)          | 29 (10.7)                                           | 31 (10.4)                                           | 45 (11.2)       | 8 (9.5)        | 4 (9.3)        |
| 40-44        | 68 (14.0)             | 40 (14.0)         | 33 (12.1)                                           | 37 (12.4)                                           | 52 (12.9)       | 16 (19.1)      | 7 (16.3)       |
| 45-49        | 63 (13.0)             | 29 (10.1)         | 27 (9.9)                                            | 31 (10.4)                                           | 58 (14.4)       | 5 (6.0)        | 2 (4.7)        |
| 50-54        | 52 (10.7)             | 29 (10.1)         | 26 (9.6)                                            | 31 (10.4)                                           | 48 (11.9)       | 4 (4.8)        | 2 (4.7)        |
| 55-69        | 44 (9.1)              | 31 (10.8)         | 30 (11.0)                                           | 31 (10.4)                                           | 38 (9.5)        | 6 (7.1)        | 6 (14.0)       |
| 60+          | 26 (5.4)              | 13 (4.6)          | 12 (4.4)                                            | 13 (4.4)                                            | 23 (5.7)        | 3 (3.6)        | 2 (4.7)        |
| Total        | 486 (100.0)           | 286 (100.0)       | 272 (100.0)                                         | 298 (100.0)                                         | 402 (100.0)     | 84 (100.0)     | 43 (100.0)     |

<sup>a</sup> Cut-off  $\leq$  32 cycle numbers (CN) as predefined by manufacturer.

<sup>b</sup> Exploratory cut-off  $\leq$  35 CNs for vaginal samples.

CIN, cervical intraepithelial neoplasia; E+Q, samples collected with Evalyn Brush (E) and Qvintip (Q) combined; N, number, Pos, positive.

Supplementary Table S2A. HrHPV concordance between vaginal (Evalyn + Qvintip) and cervical samples with exploratory cut off  $\leq 35$  cycle numbers.

|                                     | HPV type <sup>a</sup>       | +/+        | +/-        | -/+        | -/-        | Concordance [%]        | Kappa [95% CI]         |
|-------------------------------------|-----------------------------|------------|------------|------------|------------|------------------------|------------------------|
| <b>Total population<br/>(N=486)</b> | HrHPV                       | 261        | 25         | 37         | 163        | 87.24                  | 0.734 (0.673 - 0.796)  |
|                                     | HPV16                       | 64         | 3          | 12         | 407        | 96.91                  | 0.877 (0.816 - 0.938)  |
|                                     | HPV18                       | 17         | 4          | 2          | 463        | 98.77                  | 0.844 (0.721 - 0.967)  |
|                                     | Other hrHPV                 | 210        | 26         | 41         | 209        | 86.21                  | 0.725 (0.663 - 0.786)  |
|                                     | <b>HPV type<sup>a</sup></b> | <b>+/+</b> | <b>+/-</b> | <b>-/+</b> | <b>-/-</b> | <b>Concordance [%]</b> | <b>Kappa [95% CI]</b>  |
| <b>CIN3+<br/>(N=43)</b>             | HrHPV                       | 39         | 3          | 0          | 1          | 93.02                  | 0.377 (-0.155 - 0.909) |
|                                     | HPV16                       | 24         | 1          | 0          | 18         | 97.67                  | 0.953 (0.861 - 1.000)  |
|                                     | HPV18                       | 2          | 0          | 0          | 41         | 100                    | 1.000 (1.000 - 1.000)  |
|                                     | Other hrHPV                 | 20         | 3          | 3          | 17         | 86.05                  | 0.720 (0.511 - 0.928)  |
|                                     | <b>HPV type</b>             | <b>+/+</b> | <b>+/-</b> | <b>-/+</b> | <b>-/-</b> | <b>Concordance [%]</b> | <b>Kappa [95% CI]</b>  |
| <b>CIN2+<br/>(N=84)</b>             | HrHPV                       | 74         | 4          | 1          | 5          | 94.05                  | 0.635 (0.343 - 0.928)  |
|                                     | HPV16                       | 36         | 2          | 1          | 45         | 96.43                  | 0.928 (0.847 - 1.000)  |
|                                     | HPV18                       | 3          | 0          | 0          | 81         | 100.00                 | 1.000 (1.000 - 1.000)  |
|                                     | Other hrHPV                 | 48         | 4          | 5          | 27         | 89.29                  | 0.771 (0.631 - 0.912)  |
|                                     | <b>HPV type</b>             | <b>+/+</b> | <b>+/-</b> | <b>-/+</b> | <b>-/-</b> | <b>Concordance [%]</b> | <b>Kappa [95% CI]</b>  |
| <b>&lt;CIN2 (N=402)</b>             | HrHPV                       | 187        | 21         | 36         | 158        | 85.82                  | 0.715 (0.647 - 0.784)  |
|                                     | HPV16                       | 28         | 1          | 11         | 362        | 97.01                  | 0.808 (0.702 - 0.913)  |
|                                     | HPV18                       | 14         | 4          | 2          | 382        | 98.51                  | 0.816 (0.672 - 0.960)  |
|                                     | Other hrHPV                 | 162        | 22         | 36         | 182        | 85.57                  | 0.711 (0.642 - 0.780)  |

Kappa concordance between the vaginal and cervical samples is presented as follows: 0.00 – 0.20 Poor; 0.21 – 0.40 Fair; 0.41 – 0.60 Moderate; 0.61 – 0.80 Good; 0.81 – 1.00 Excellent.

<sup>a</sup>Cut-off  $\leq 32$  cycle numbers (CN) as predefined by manufacturer for cervical samples and exploratory cut-off  $\leq 35$  for vaginal samples.

N, number; CI, 95% confidence interval; CIN, cervical intraepithelial neoplasia.

+/+ positive on vaginal and cervical samples, +/- positive only on cervical samples, -/+ positive only on vaginal samples, -/- negative on both sample types.

Supplementary Table S2B. HrHPV concordance between sample collected with Evalyn Brush and cervical samples with exploratory cut off  $\leq 35$  cycle numbers.

|                                     | HPV type <sup>a</sup> | +/+ | +/- | -/+ | -/-   | Concordance [%]       | Kappa [95% CI]        |
|-------------------------------------|-----------------------|-----|-----|-----|-------|-----------------------|-----------------------|
| <b>Total population<br/>(N=228)</b> | HrHPV                 | 128 | 12  | 10  | 78    | 90.35                 | 0.797 (0.717 - 0.878) |
|                                     | HPV16                 | 38  | 2   | 3   | 185   | 97.81                 | 0.925 (0.860 - 0.990) |
|                                     | HPV18                 | 12  | 4   | 1   | 211   | 97.81                 | 0.816 (0.659 - 0.973) |
|                                     | Other hrHPV           | 93  | 13  | 16  | 106   | 87.28                 | 0.745 (0.658 - 0.832) |
| <b>CIN3+<br/>(N=23)</b>             | HPV type <sup>a</sup> | +/+ | +/- | -/+ | -/-   | Concordance [%]       | Kappa [95% CI]        |
|                                     | HrHPV                 | 22  | 1   | 0   | 1     | 95.65                 | 0.646 (0.012 - 1.000) |
|                                     | HPV16                 | 17  | 1   | 0   | 5     | 95.65                 | 0.881 (0.654 - 1.000) |
|                                     | HPV18                 | 23  | 0   | 0   | 0     | N/A                   | N/A                   |
| Other hrHPV                         | 7                     | 1   | 2   | 13  | 86.96 | 0.721 (0.428 - 1.000) |                       |
| <b>CIN2+<br/>(N=47)</b>             | HPV type              | +/+ | +/- | -/+ | -/-   | Concordance [%]       | Kappa [95% CI]        |
|                                     | HrHPV                 | 43  | 1   | 0   | 3     | 97.87                 | 0.846 (0.551 - 1.000) |
|                                     | HPV16                 | 26  | 2   | 0   | 19    | 95.74                 | 0.913 (0.796 - 1.000) |
|                                     | HPV18                 | 1   | 0   | 0   | 46    | 100.00                | 1.000 (1.000 - 1.000) |
| Other hrHPV                         | 23                    | 1   | 3   | 20  | 91.49 | 0.829 (0.670 - 0.989) |                       |
| <b>&lt;CIN2 (N=181)</b>             | HPV type              | +/+ | +/- | -/+ | -/-   | Concordance [%]       | Kappa [95% CI]        |
|                                     | HrHPV                 | 85  | 11  | 10  | 75    | 88.40                 | 0.767 (0.674 - 0.861) |
|                                     | HPV16                 | 12  | 0   | 3   | 166   | 98.34                 | 0.880 (0.746 - 1.000) |
|                                     | HPV18                 | 11  | 4   | 1   | 165   | 97.24                 | 0.800 (0.630 - 0.970) |
| Other hrHPV                         | 70                    | 12  | 13  | 86  | 86.19 | 0.722 (0.620 - 0.823) |                       |

Kappa concordance between the vaginal and cervical samples is presented as follows: 0.00 – 0.20 Poor; 0.21 – 0.40 Fair; 0.41 – 0.60 Moderate; 0.61 – 0.80 Good; 0.81 – 1.00 Excellent.

<sup>a</sup>Cut-off  $\leq 32$  cycle numbers (CN) as predefined by manufacturer for cervical samples and exploratory cut-off  $\leq 35$  for vaginal samples.

N, number; CI, 95% confidence interval; CIN, cervical intraepithelial neoplasia; N/A, not available.

+/+ positive on vaginal and cervical samples, +/- positive only on cervical samples, -/+ positive only on vaginal samples, -/- negative on both sample types.

Supplementary Table S2C. HrHPV concordance between sample collected with Qvintip and cervical samples with exploratory cut off  $\leq 35$  cycle numbers.

|                                     | HPV type <sup>a</sup> | +/+ | +/- | -/+ | -/- | Concordance [%] | Kappa [95% CI]         |
|-------------------------------------|-----------------------|-----|-----|-----|-----|-----------------|------------------------|
| <b>Total population<br/>(N=258)</b> | HrHPV                 | 133 | 13  | 27  | 85  | 84.50           | 0.680 (0.589 - 0.770)  |
|                                     | HPV16                 | 26  | 1   | 9   | 222 | 96.12           | 0.817 (0.708 - 0.927)  |
|                                     | HPV18                 | 5   | 0   | 1   | 252 | 99.61           | 0.907 (0.726 - 1.000)  |
|                                     | Other hrHPV           | 117 | 13  | 25  | 103 | 85.27           | 0.705 (0.619 - 0.791)  |
| <b>CIN3+<br/>(N=20)</b>             | HrHPV                 | 18  | 2   | 0   | 0   | 90.00           | N/A                    |
|                                     | HPV16                 | 7   | 0   | 0   | 13  | 100             | 1.000 (1.000 - 1.000)  |
|                                     | HPV18                 | 2   | 0   | 0   | 18  | 100             | 1.000 (1.000 - 1.000)  |
|                                     | Other hrHPV           | 13  | 2   | 1   | 4   | 85.00           | 0.625 (0.243 - 1.000)  |
| <b>CIN2+<br/>(N=37)</b>             | HrHPV                 | 31  | 3   | 1   | 2   | 89.19           | 0.444 (-0.006 - 0.894) |
|                                     | HPV16                 | 10  | 0   | 1   | 26  | 97.30           | 0.934 (0.805 - 1.000)  |
|                                     | HPV18                 | 2   | 0   | 0   | 35  | 100.00          | 1.000 (1.000 - 1.000)  |
|                                     | Other hrHPV           | 25  | 3   | 2   | 7   | 86.49           | 0.646 (0.363 - 0.929)  |
| <b>&lt;CIN2 (N=221)</b>             | HrHPV                 | 102 | 10  | 26  | 83  | 83.71           | 0.674 (0.577 - 0.770)  |
|                                     | HPV16                 | 16  | 1   | 8   | 196 | 95.93           | 0.759 (0.608 - 0.909)  |
|                                     | HPV18                 | 3   | 0   | 1   | 217 | 99.55           | 0.855 (0.574 - 1.000)  |
|                                     | Other hrHPV           | 92  | 10  | 23  | 96  | 85.07           | 0.702 (0.609 - 0.795)  |

Kappa concordance between the vaginal and cervical samples is presented as follows: 0.00 – 0.20 Poor; 0.21 – 0.40 Fair; 0.41 – 0.60 Moderate; 0.61 – 0.80 Good; 0.81 – 1.00 Excellent.

<sup>a</sup>Cut-off  $\leq 32$  cycle numbers (CN) as predefined by manufacturer for cervical samples and exploratory cut-off  $\leq 35$  for vaginal samples.

N, number; CI, 95% confidence interval; CIN, cervical intraepithelial neoplasia; N/A, not available.

+/+ positive on vaginal and cervical samples, +/- positive only on cervical samples, -/+ positive only on vaginal samples, -/- negative on both sample types.

Supplementary Table S3A. Comparison of median CN values between cervical and vaginal samples.

|                    | <b>N</b> | <b>Median CN cervical [IQR]</b> | <b>Median CN vaginal (E+Q) [IQR]</b> | <b>p-value paired t-test</b> |
|--------------------|----------|---------------------------------|--------------------------------------|------------------------------|
| <b>HPV16</b>       | 63       | 20.3 [18.2-23.2]                | 22.0 [20.4-23.9]                     | 0.0006                       |
| <b>HPV18</b>       | 16       | 22.4 [19.7-25.7]                | 22.9 [18.1-25.0]                     | 0.3254                       |
| <b>Other hrHPV</b> | 196      | 21.9 [18.8-24.6]                | 22.7 [18.9-26.1]                     | 0.0004                       |
| <b>Beta-globin</b> | 486      | 22.6 [21.5- 24.1]               | 22.4 [21.3-23.9]                     | 0.4958                       |

Supplementary Table S3B. Comparison of median CN values between cervical and vaginal samples collected with Evalyn Brush

|                    | <b>N</b> | <b>Median CN cervical [IQR]</b> | <b>Median CN Evalyn [IQR]</b> | <b>p-value paired t-test</b> |
|--------------------|----------|---------------------------------|-------------------------------|------------------------------|
| <b>HPV16</b>       | 38       | 20.5 [18.3-23.6]                | 22.9 [20.8-27.1]              | 0.0038                       |
| <b>HPV18</b>       | 12       | 23.9 [19.7-26.5]                | 23.2 [18.6-26.2]              | 0.3882                       |
| <b>Other hrHPV</b> | 86       | 22.4 [19.6-25.5]                | 24.2 [20.0-26.6]              | 0.0074                       |
| <b>Beta-globin</b> | 228      | 22.6 [21.6- 24.1]               | 22.6 [21.2-24.4]              | 0.8852                       |

Supplementary Table S3C. Comparison of median CN values between cervical and vaginal samples collected with Qvintip.

|                    | <b>N</b> | <b>Median CN cervical [IQR]</b> | <b>Median CN Qvintip [IQR]</b> | <b>p-value paired t-test</b> |
|--------------------|----------|---------------------------------|--------------------------------|------------------------------|
| <b>HPV16</b>       | 25       | 20.1 [18.0-21.9]                | 21.4 [19.4-22.6]               | 0.1462                       |
| <b>HPV18</b>       | 4        | 21.0 [18.5-22.7]                | 20.7 [15.9-23.1]               | 0.4652                       |
| <b>Other hrHPV</b> | 110      | 21.6 [18.3- 23.9]               | 22.3 [18.3- 25.9]              | 0.0208                       |
| <b>Beta-globin</b> | 258      | 22.6 [21.5- 24.1]               | 22.2 [21.3-23.7]               | 0.2577                       |

Cut-off  $\leq 32$  cycle numbers (CN) as predefined by manufacturer.

IQR, interquartile range (25-75%); E+Q, samples collected with Evalyn Brush (E) and Qvintip (Q) combined; N, number.

Mann-Whitney test was used to compare differences in median CN values of matched cervical and vaginal samples.

Supplementary Table S4A. Comparison of median CN values for cervical samples between CIN2+ and <CIN2.

|                    | N      | Median CN <CIN2<br>[IQR] | Median CN CIN2+<br>[IQR] | p-value paired<br>t-test |
|--------------------|--------|--------------------------|--------------------------|--------------------------|
| <b>HPV16</b>       | 29/38  | 21.7 [18.2-25.0]         | 20.2 [18.3- 23.2]        | 0.4072                   |
| <b>HPV18</b>       | 18/3   | 22.4 [19.19-26.8]        | 23.6 [16.7-24.8]         | 0.6153                   |
| <b>Other hrHPV</b> | 184/52 | 22.7 [20.0-26.1]         | 21.2 [18.7- 24.6]        | 0.0436                   |
| <b>Beta-globin</b> | 402/84 | 22.8 [21.5- 24.2]        | 22.4 [21.4-23.4]         | 0.0236                   |

Supplementary Table 4B. Comparison of median CN values for vaginal samples between CIN2+ and <CIN2.

|                    | N      | Median CN <CIN2<br>[IQR] | Median CN CIN2+<br>[IQR] | p-value paired<br>t-test |
|--------------------|--------|--------------------------|--------------------------|--------------------------|
| <b>HPV16</b>       | 34/37  | 21.8 [20.2-26.4]         | 22.7 [21.3-23.9]         | 0.7126                   |
| <b>HPV18</b>       | 15/3   | 22.9 [17.9-26.6]         | 23.2 [23.0-23.6]         | 0.8590                   |
| <b>Other hrHPV</b> | 173/48 | 23.6 [19.7-26.9]         | 22.2 [18.7-25.4]         | 0.2145                   |
| <b>Beta-globin</b> | 402/84 | 22.5 [21.3-24.2]         | 22.2 [21.1-23.7]         | 0.1551                   |

<sup>a</sup> number of HPV positive samples in women with <CIN2 versus CIN2+

Cut-off ≤ 32 cycle numbers (CN) as predefined by manufacturer.

IQR, interquartile range (25-75%); CIN, cervical intraepithelial neoplasia; E+Q, samples collected with Evalyn Brush (E) and Qvintip (Q) combined; N, number. Wilcoxon signed-rank test was used to compare differences in median CN values.

Supplementary Table S5A. Association between age and CN values using quantile regression analysis in cervical samples.

| Age         | Coef.  | p-value | [95% Conf | Interval] |
|-------------|--------|---------|-----------|-----------|
| HPV16       | 0.058  | 0.586   | -0.151    | 0.267     |
| HPV18       | -0.154 | 0.389   | -0.507    | -0.507    |
| Other hrHPV | -0.057 | 0.416   | -0.197    | 0.081     |
| Beta-globin | -0.524 | 0.236   | -1.393    | 0.344     |

Supplementary Table S5B. Association between age and CN values using quantile regression analysis in vaginal self-samples (Evalyn Brush +Qvintip).

| Age         | Coef.  | p-value | [95% Conf | Interval] |
|-------------|--------|---------|-----------|-----------|
| HPV16       | -0.130 | 0.195   | -0.327    | 0.067     |
| HPV18       | 0.037  | 0.851   | -0.355    | 0.431     |
| Other hrHPV | -0.122 | 0.080   | -0.259    | 0.014     |
| Beta-globin | 1.282  | <0.001  | 0.563     | 2.000     |

Coef, quantile regression coefficient.

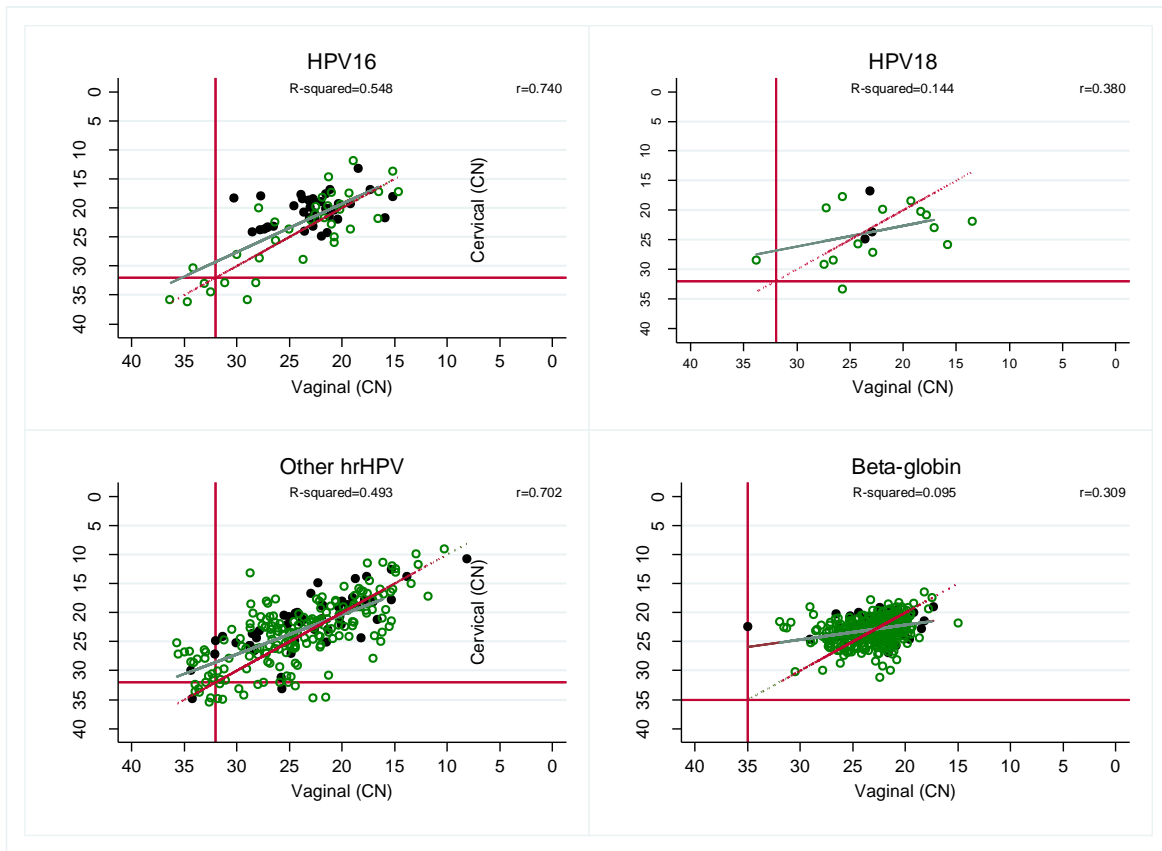

Supplementary Figure S1A-D. Scatter plots presenting correlation in cycle numbers (CN) values between cervical and vaginal self-samples for HPV16, HPV18, other hrHPV and human  $\beta$ -globin. Samples with CNs equal to zero are samples with undetectable HPV or human  $\beta$ -globin and therefore are excluded from the scatter plot. Red vertical and horizontal lines represent the manufacturer defined CN cut-offs.

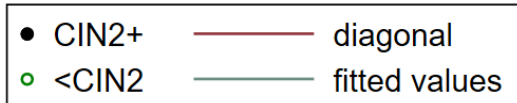



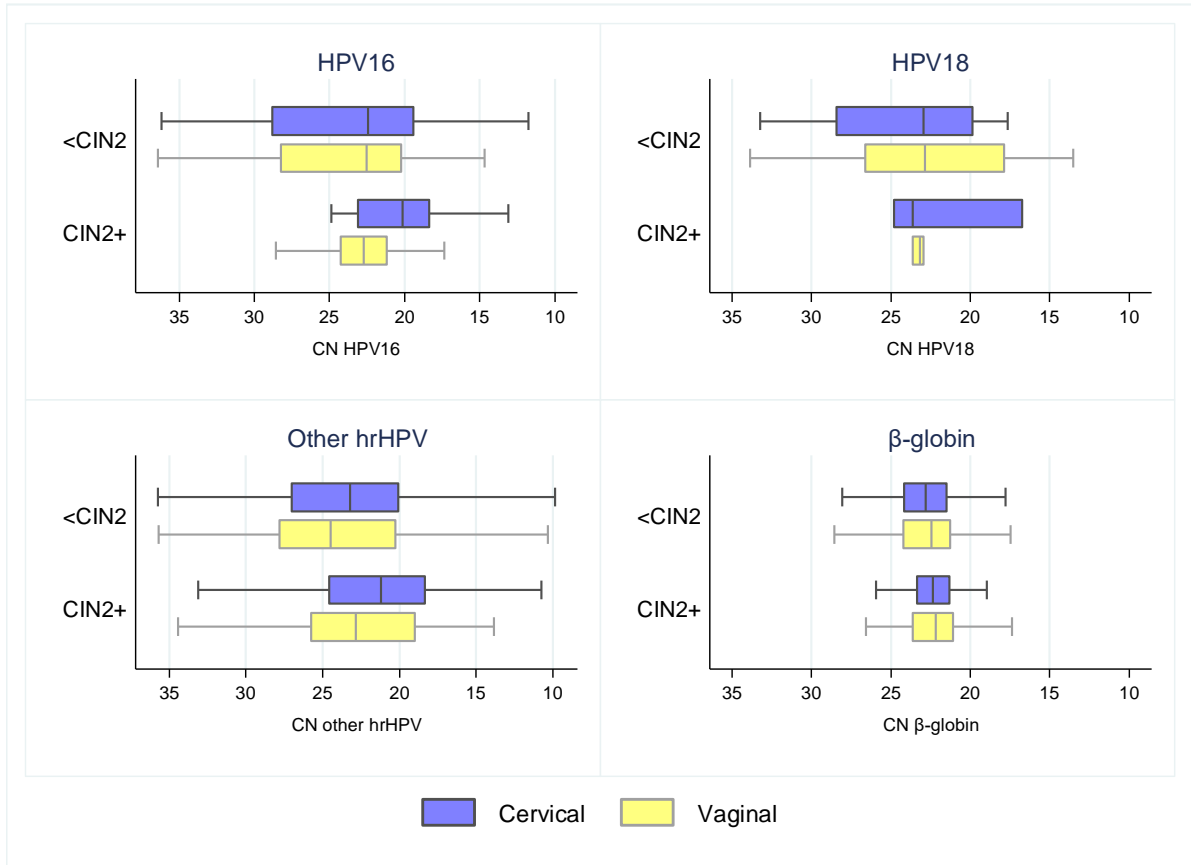

Supplementary Figure S2. RealTime High Risk HPV cycle number (CN) values on cervical and vaginal samples with CIN2+ compared to <CIN2. Boxplots indicate median CN-values, interquartile ranges and extreme values (whiskers) for HPV16, 18, other hrHPV and  $\beta$ -globin. Median values are presented in Supplementary Table S4.
